# Supplementary material for: Adherence to Annual Fundus Exams among Chinese Population with Diagnosed Diabetes
Source: MDPI journal article supplement (doi:10.3390/jcm11226859), 2022-11-21
Supplement: s1 [file s1]

**Table S1.** Adherence rate of diabetic patients complying with annual fundus exam.

| Annual Fundus Exam (%) | 2011 ( <i>n</i> = 985) | 2013 ( <i>n</i> = 1025) | 2015 ( <i>n</i> = 1027) | 2018 ( <i>n</i> = 1050) | <i>p</i> < 0.001 |
|------------------------|------------------------|-------------------------|-------------------------|-------------------------|------------------|
| Yes                    | 231 (23.5 %)           | 157 (15.3 %)            | 180 (17.5 %)            | 226 (21.5 %)            |                  |
| No                     | 754 (76.5 %)           | 868 (84.7 %)            | 847 (82.5 %)            | 824 (78.5 %)            |                  |

Adherence rates (proportion) to annual fundus examinations among diabetic patients in China. Changes in adherence rates over 7 years were assessed by Pearson $\chi^2$ .

**Table S2.** Changes in descriptive characteristics of Non-adherent sample from 2011 to 2018.

| Variables                        | 2011 ( <i>n</i> = 985) | 2013 ( <i>n</i> = 1025) | 2015 ( <i>n</i> = 1027) | 2018 ( <i>n</i> = 1050) | <i>p</i> Value |
|----------------------------------|------------------------|-------------------------|-------------------------|-------------------------|----------------|
| Gender                           |                        |                         |                         |                         | 0.9563         |
| Male                             | 326 (43.2 %)           | 381 (43.9 %)            | 378 (44.6 %)            | 361 (43.8 %)            |                |
| Female                           | 428 (56.8 %)           | 487 (56.1 %)            | 469 (55.4 %)            | 463 (56.2 %)            |                |
| Age                              | 61.07± 9.24            | 61.98± 9.27             | 63.68± 9.10             | 62.61± 9.39             | <0.001         |
| Education                        |                        |                         |                         |                         | 0.9255         |
| Illiterate                       | 197 (26.1 %)           | 207 (23.8 %)            | 208 (24.6 %)            | 219 (26.6 %)            |                |
| Less than elementary school      | 304 (40.3 %)           | 371 (42.7 %)            | 356 (42.0 %)            | 348 (42.2 %)            |                |
| Middle school                    | 146 (19.4 %)           | 168 (19.4 %)            | 166 (19.6 %)            | 150 (18.2 %)            |                |
| High school or vocational school | 84 (11.1 %)            | 96 (11.1 %)             | 87 (10.3 %)             | 89 (10.8 %)             |                |
| college and above                | 23 (3.1 %)             | 26 (3.0 %)              | 30 (3.5 %)              | 18 (2.2 %)              |                |
| Marital status                   |                        |                         |                         |                         | 0.3206         |
| Yes                              | 611 (81.0 %)           | 723 (83.3 %)            | 699 (82.5 %)            | 660 (80.1 %)            |                |
| No                               | 143 (19.0 %)           | 145 (16.7 %)            | 148 (17.5 %)            | 164 (19.9 %)            |                |
| Smoke                            |                        |                         |                         |                         | 0.0162         |
| Yes                              | 263 (34.9 %)           | 327 (37.7 %)            | 354 (41.8 %)            | 292 (35.4 %)            |                |
| No                               | 490 (65.1 %)           | 541 (62.3 %)            | 493 (58.2 %)            | 532 (64.6 %)            |                |
| Drinking status                  |                        |                         |                         |                         | 0.7025         |
| Drink more than once a month     | 130 (17.3 %)           | 162 (18.7 %)            | 162 (19.1 %)            | 171 (20.8 %)            |                |
| Drink but less than once a month | 50 (6.6 %)             | 64 (7.4 %)              | 58 (6.8 %)              | 59 (7.2 %)              |                |
| None of these                    | 573 (76.1 %)           | 642 (74.0 %)            | 627 (74.0 %)            | 594 (72.1 %)            |                |
| Using diabetes medication        |                        |                         |                         |                         | <0.001         |
| Yes                              | 512 (67.9 %)           | 534 (61.5 %)            | 512 (60.4 %)            | 469 (56.9 %)            |                |
| No                               | 242 (32.1 %)           | 334 (38.5 %)            | 335 (39.6 %)            | 355 (43.1 %)            |                |
| Non-medication treatments        |                        |                         |                         |                         | 0.0749         |
| Yes                              | 298 (39.5 %)           | 335 (38.6 %)            | 298 (35.2 %)            | 340 (41.3 %)            |                |
| No                               | 456 (60.5 %)           | 533 (61.4 %)            | 549 (64.8 %)            | 484 (58.7 %)            |                |
| Multi-morbidities                |                        |                         |                         |                         | <0.001         |
| Yes                              | 651 (86.3 %)           | 738 (85.0 %)            | 753 (88.9 %)            | 655 (79.5 %)            |                |
| No                               | 103 (13.7 %)           | 130 (15.0 %)            | 94 (11.1 %)             | 169 (20.5 %)            |                |
| Vision impairment                |                        |                         |                         |                         | <0.001         |
| Yes                              | 382 (50.7 %)           | 428 (49.3 %)            | 344 (40.6 %)            | 296 (35.9 %)            |                |
| No                               | 372 (49.3 %)           | 440 (50.7 %)            | 503 (59.4 %)            | 528 (64.1 %)            |                |
| Regular physical exam            |                        |                         |                         |                         | <0.001         |
| Yes                              | 496 (65.8 %)           | 479 (55.2 %)            | 449 (53.0 %)            | 458 (55.6 %)            |                |
| No                               | 258 (34.2 %)           | 389 (44.8 %)            | 398 (47.0 %)            | 366 (44.4 %)            |                |
| Insurance cover                  |                        |                         |                         |                         | <0.001         |
| Yes                              | 709 (94.0 %)           | 820 (94.5 %)            | 816 (96.3 %)            | 806 (97.8 %)            |                |
| No                               | 45 (6.0 %)             | 48 (5.5 %)              | 31 (3.7 %)              | 18 (2.2 %)              |                |

**Table S3.** Different sample size of diabetes in CHARLS 2011 and adherence rate to annual fundus exam based on four definitions of diabetes.

| Year               | Self-Reported Diabetes | Reference Defined Diabetes | Unaware of Diabetes | Total Diabetes |
|--------------------|------------------------|----------------------------|---------------------|----------------|
| 2011               | 985                    | 1544                       | 1157                | 2142           |
| Annual fundus exam |                        |                            |                     |                |
| Yes                | 233                    | 89                         | 0                   | 233            |
| No                 | 754                    | 1455                       | 1157                | 1909           |
| Adherence rate     | 23.65%                 | 5.76%                      | None                | 10.88%         |

Reference defined diabetes: Fasting blood glucose (FBG), random blood glucose (RBC) or HbA1c measurement (FBG  $\geq$  126 mg/dl, RBC  $\geq$  198 mg/dl or HbA1c  $\geq$  6.5%); Unaware af diabetes: Abnormal blood test but responded 'no diabetes' in questionnaire; Total diabetes: Self-reported diabetes or defined by blood test.
